# Supplementary material for: Carbone-type Reactivity by a Neutral Antimony(I) Compound in Bond Activation and Catalysis
Source: Research Square preprint supplement (doi:10.21203/rs.3.rs-7768275/v1), 2025-10-14
Supplement: Supplementary file 1 [file 6101a172f6a32dfff75036aa.docx]

Supporting Information for

**Carbone-type Reactivity by a Neutral Antimony (I) Compound in Bond Activation and Catalysis.**

Jinyang Zhou,1 Qiuran Wang,1 Liuyang Chen,1 Herbert W. Roesky,2 Shaoguang Zhang*1

1 *Key Laboratory of Bioorganic Phosphorus Chemistry and Chemical Biology (Ministry of Education), Department of Chemistry, Tsinghua University, Beijing 100084, China*

2 *Institut für Anorganische Chemie, Georg-August-Universität Göttingen, Göttingen 37077, Germany*

E-mail: sgzhang@tsinghua.edu.cn

**Table of Contents**

1. Experimental Details and Characterization Data for All New Compounds S2

2. Spectroscopic Data S8

3. Summary of Crystal Data S20

4. Details of Computational Results S24

5. References S30

**Experimental Details and Characterization Data for All New Compounds**

**General Methods.** All reactions were performed using standard Schlenk techniques, or in a Vigor glovebox under an inert atmosphere of N2. Glassware, stir bars, filter aid (Celite) and 4Å molecular sieves were dried in an oven at 105 °C for at least 12 h prior to use. Solvents (*n*-pentane, *n*-hexane, THF) were dried over sodium benzophenone ketyl, or by passage through a column of activated alumina (toluene, diethyl ether, DME), deoxygenated by sparging with N2 for 15 min, and stored over 4Å molecular sieves. Deuterated solvents were purchased from J&K or Cambridge Isotope Laboratories, Inc., and dried over potassium mirror (C6D6), CaH2 (CD3CN, CDCl3), or sodium-potassium alloy (THF-*d*8), distilled and stored under N2 over activated 4Å molecular sieves. DMSO-*d6* (D, 99.9%) was purchased from Cambridge Isotope Laboratories and used without further purification.

KC8 was synthesized according to literature procedures and stored under nitrogen at -30 °C in a glovebox prior to use.[1] Lithium diisopropylamide (LDA) [2], [(Ph,*t*BuIm)(OTf)], [(Ph,*t*BuBCB)(Li·Et2O)] [3] and Ph2BCl [4] were prepared according to the literature procedures. Other materials were purchased from commercial suppliers and were used without further purification, unless otherwise stated. 1H, 13C{1H}, 11B{1H}, 19F{1H}, 1H-13C HSQC and 1H-1H COSY NMR spectra were recorded on Bruker Avance III HD 400 MHz and AVANCE NEO 500 MHz spectrometers at 25°C, unless otherwise stated. All chemical shifts (*δ*) are reported in units of ppm, with references to the residues protio-solvent resonance for proton and carbon chemical shifts. 1H NMR spectroscopy: *δ* = 2.50 ppm (DMSO-*d*6), 7.26 ppm (CDCl3), 7.16 ppm (C6D6), 1.72 and 3.58 ppm (THF-*d*8), 1.92 ppm (CD3CN). 13C NMR spectroscopy: *δ* = 39.52 ppm (DMSO-*d*6), 77.16 ppm (CDCl3), 128.06 ppm (C6D6), 26.19 and 68.03 ppm (THF-*d*8), 1.32 and 118.26 ppm (CD3CN). External CFCl3, BF3·Et2O were used for referencing 19F, and 11B NMR chemical shifts, respectively. Elemental analysis was performed on a Vario EL CUBE elemental analyzer (Elementar, Germany) following the standard method JY/T 0580-2020 (General rules for elemental analyzers).

**Synthetic procedures and characterization data.**

Synthesis of [(Ph,*t*BuBCB)(SbCl2)](**1**):

In a nitrogen filled glove box, a 100 mL of Schlenk tube was charged with a solution of [(Ph,*t*BuBCB)(Li·Et2O)] (1.0 g, 2.03 mmol, 1.0 equiv.) in 25 mL of toluene and a magnetic stir bar, placed in a liquid nitrogen chilled cold well, and frozen at -160°C. A chilled solution of SbCl3 (464.0 mg, 2.03 mmol, 1.0 equiv.) in 25 mL of toluene were added slowly for over a period of 10 min. The liquid nitrogen bath was removed and the cold well was slowly warmed from -160 to -10°C. At this temperature, the mixture was allowed to stir for 2 h. All volatiles were removed under vacuum, affording white solids. The residues solids were washed with pentane (3 × 5 mL), and then extracted with toluene (3 × 20 mL). The toluene solution was concentrated until about 20 mL remained. Slow vapor diffusion of pentane into the concentrated toluene solution at -30°C for 1 day to afford colorless needle crystals, which were suitable for X-ray crystallography. The resulting crystalline products are stable and could be stored at room temperature under nitrogen atmosphere in the glovebox. Yield 610 mg (50%).

**1H NMR** (400 MHz, C6D6, 298 K) *δ* = 7.76 (d, 4H, *J* = 6.6 Hz, B(C6*H*5)2), 7.35 (t, 4H, *J* = 7.6 Hz, B(C6*H*5)2), 7.19 (t, 2H, *J* = 7.3 Hz, B(C6*H*5)2), 6.91 (d, 2H, *J* = 1.9 Hz, NHC-*H*), 6.26 (d, 2H, *J* = 1.9 Hz, NHC-*H*), 1.33 (s, 18H, C(C*H*3)3) ppm. **1H NMR** (400 MHz, THF-*d*8, 298 K) *δ* = 7.45 (d, 2H, *J* = 2.1 Hz, B(C6*H*5)2), 7.31 (d, 4H, *J* = 6.1 Hz, B(C6*H*5)2), 7.12 (t, 4H, *J* = 7.6 Hz, B(C6*H*5)2), 7.09 (d, 2H, *J* = 1.9 Hz, NHC-*H*), 6.98 (d, 2H, *J* = 1.9 Hz, NHC-*H*), 1.88 (s, 18H, C(CH3)3) ppm. **13C{1H} NMR** (101 MHz, THF-*d*8, 298 K) *δ* = 32.14 (s, C(*C*H3)3), 61.18 (s, *C*(CH3)3), 120.41 (s, NHC-*C*H), 126.97 (s, NHC-*C*H), 127.60 (s, *C*6H5, *Cpara*), 127.89 (s, *C*6H5, *Cmeta*), 135.26 (s, *C*6H5, *Cortho*), 150.16 (brs, B-*Cipso*), 155.03 (s, *Ccarbene*-Sb) ppm. **11B{1H} NMR** (128 MHz, THF-*d*8, 298 K) *δ* = 3.89 (brs) ppm. Anal. Calcd. for C26H32BCl2N4Sb: C, 51.70; H, 5.34; N, 9.28; Found: C, 51.01; H, 5.18; N, 9.42.

Synthesis of [(Ph,*t*BuBCB)Sb](**2**):

In a nitrogen filled glove box, a 20 mL scintillation vial was charged with a solution of [(Ph,*t*BuBCB)(SbCl2)] (100 mg, 165 μmol, 1.0 equiv.) in 10 mL of THF and a magnetic stir bar, a chilled solution of KBH*s*Bu3 (330 μmol, 330 μL, 1 M in THF, 2.0 equiv.) was added to this solution at -30 °C. Then the reaction mixture was slowly warmed to 25°C, the mixture was allowed to stir for 2 h to give a light-yellow clear solution. All volatiles were removed under vacuum, affording yellow solids. The residues solids were washed with Et2O (3 × 2 mL), and then extracted with toluene (3 × 10 mL). The toluene solution was concentrated until 5 mL remained. Slow vapor diffusion of pentane into the concentrated toluene solution at -30°C for 1 day to afford light-yellow plate crystals, which were suitable for X-ray crystallography. Yield 52.0 mg (65%).

**1H NMR** (400 MHz, C6D6, 298 K) *δ* = 7.23–7.35 (m, 10H, B(C6*H*5)2), 6.82 (d, 2H, *J* = 2.0 Hz, NHC-*H*), 6.54 (d, 2H, *J* = 1.9 Hz, NHC-*H*), 1.26 (s, 18H, C(C*H*3)3) ppm. **1H NMR** (400 MHz, THF-*d*8, 298 K) *δ* = 7.26 (d, 2H, *J* = 2.0 Hz, NHC-*H*), 7.05-7.07 (m, 6H, B(C6*H*5)2), 6.82-6.84 (m, 4H, B(C6*H*5)2), 6.61 (d, 2H, *J* = 1.9 Hz, NHC-*H*), 1.65 (s, 18H, C(C*H*3)3) ppm. **13C{1H} NMR** (101 MHz, THF-*d*8, 298 K) *δ* = 29.54 (s, C(*C*H3)3), 58.75 (s, *C*(CH3)3), 118.56 (s, NHC-*C*H), 126.37 (s, NHC-*C*H), 126.94 (s, *C*6H5, *Cpara*), 127.48 (s, *C*6H5, *Cmeta*), 135.32 (s, *C*6H5, *Cortho*), 150.19 (brs, B-*Cipso*) 156.57 (s, *Ccarbene*-Sb) ppm. **11B{1H} NMR** (128 MHz, C6D6, 298 K) *δ* = 2.16 (brs) ppm. **11B{1H} NMR** (128 MHz, THF-*d*8, 298 K) *δ* = 1.63 (brs) ppm. Anal. Calcd. for C26H32BN4Sb: C, 58.57; H, 6.05; N, 10.51; Found: C, 58.52; H, 6.00; N, 10.50.

Formation of [(Ph,*t*BuBCB)(SbCl2)](**1**) via the reaction of [(Ph,*t*BuBCB)Sb](**2**) with Ph3CCl:

In a nitrogen filled glove box, a sealable NMR tube with a J Young® valve was charged with [(Ph,*t*BuBCB)Sb] (5.3 mg, 10.0 μmol, 1.0 equiv.) in 0.5 mL of C6D6, and Ph3CCl (5.9 mg, 20.0 μmol, 2.0 equiv.) was added. After 1 h at 25°C, the 1H NMR spectrum of the reaction mixture showed the full conversion into [(Ph,*t*BuBCB)(SbCl2)](**1**) and Gomberg’s dimer.

Synthesis of (Ph,*t*BuBCB)Sb[Rh(CO)(acac)] (**3**):

In a nitrogen filled glove box, a sealable NMR tube with a J Young® valve was charged with [(Ph,*t*BuBCB)Sb] (10.6 mg, 20.0 μmol, 1.0 equiv.) in 0.5 mL of C6D6, and Rh(acac)(CO)2 (5.2 mg, 20.0 μmol, 1.0 equiv.) was added. The reaction progress was monitored by 1H NMR, showing the completion of the reaction after 10 min at 25°C. All volatiles were removed under vacuum. The residues were washed with pentane (3 ×1 mL) and extracted with toluene (3 × 1 mL). All volatiles of the toluene solution were removed to afford light yellow solids. Yield 5.2 mg (34 %).

**1H NMR** (400 MHz, THF-*d*8, 298 K) *δ* = 7.54 (d, 2H, *J* = 1.9 Hz, NHC-*H*), 7.21–7.16 (m, 5H, B(C6*H*5)2), 7.06–7.02 (m, 3H, B(C6*H*5)2), 6.74 (d, 2H, *J* = 1.9 Hz, NHC-*H*), 6.44 (dd, 2H, *J* = 6.5, 3.0 Hz, B(C6*H*5)2), 5.30 (s, 1H, acac-C*H*), 1.94 (s, 18H, C(C*H*3)3), 1.88 (s, 3H, acac-C*H*3), 1.76 (s, 3H, acac-C*H*3) ppm. **11B{1H} NMR** (128 MHz, THF-*d*8, 298 K) *δ* = 2.10 (brs) ppm. **13C{1H} NMR** (101 MHz, THF-*d*8, 298 K) *δ* = 27.63 (s, acacC-*C*H3), 28.24 (s, acacC-*C*H3), 31.13 (s, C(*C*H3)3), 60.97 (s, *C*(CH3)3), 99.95 (d), 121.02 (s, NHC-*C*H), 126.52 (s, B-*Cipso*), 127.61 (s, B-*Cipso*), 127.83 (s, NHC-*C*H), 128.21 (s, *C*6H5, *Cortho*), 132.56 (s, *C*6H5, *Cmeta*), 136.26 (s, *C*6H5, *Cpara*), 148.26 (s, acac*C*-Me), 184.27, 188.15, 190.08, 190.85. Anal. Calcd. for C32H42BN4O3SbRh: C, 50.16; H, 5.53; N, 7.31; Found: C, 50.11; H, 5.48; N, 7.30.

Synthesis of (Ph,*t*BuBCB)Sb[PdCl(η3-allyl)]2 (**4**):

In a nitrogen filled glove box, a sealable NMR tube with a J Young® valve was charged with [(Ph,*t*BuBCB)Sb] (5.3 mg, 10.0 μmol, 1.0 equiv.) in 0.5 mL of C6D6, and [Pd(*η*3-C3H5)(μ-Cl)]2 (3.6 mg, 10.0 μmol, 1.0 equiv.) was added. The reaction progress was monitored by 1H NMR, showing the completion of the reaction after 30 min at 25°C. All volatiles were removed under vacuum. The residues were washed with toluene (3 ×1 mL) and extracted with THF (3 × 1 mL). All volatiles of the THF solution were removed to afford orange solids. Yield 5.9 mg (65 %). The compound **4** was not stable enough in room temperature for element analysis.

**1H NMR** (500 MHz, CD2Cl2, 298 K) *δ* = 7.32 (m, 2 H, NHC-*H*), 7.19–7.16 (m, 6 H, B(C6*H*5)2), 6.93–6.99 (m, 4 H, B(C6*H*5)2), 6.81 (m, 2 H, NHC-*H*), 4.96 (brs, 2 H, allyl), 4.46 (brs, 2 H, allyl), 3.68 (m, 2 H, allyl), 3.55 (brs, 2 H, allyl), 3.39 (brs, 2 H, allyl), 1.83 (s, 18 H, C(C*H*3)3) ppm. **11B{1H} NMR** (160 MHz, CD2Cl2, 298 K) *δ* = 2.52 (brs) ppm. **13C{1H} NMR** (126 MHz, CD2Cl2, 298 K) *δ* = 25.99 (s, C(*C*H3)3), 31.97(s, *C*(CH3)3), 60.65 (s, allyl), 68.17 (s, allyl), 76.82 (s, allyl), 112.94 (s, *C*6H5), 120.48 (brs, NHC-*C*H), 127.13 (s, *C*6H5), 128.07 (s, *C*6H5), 128.42 (brs, NHC-*C*H), 133.90 (s, *C*6H5), 149.60 (brs, *Ccarbene*-Sb).

Synthesis of [(Ph,*t*BuBCB)Sb(C6F4)BF(C6F5)2] (**5**):

In a nitrogen filled glove box, a 20 mL scintillation vial was charged with a solution of [(Ph,*t*BuBCB)Sb] (10.6 mg, 20 μmol, 1.0 equiv.) in 10 mL of toluene and a magnetic stir bar, a chilled solution of BCF (13.2 mg, 25.6 μmol, 1.27 equiv.) was added to this solution at -30 °C. Then the reaction mixture was slowly warmed to 25°C, the mixture was allowed to stir for 5 h to give a clear colorless solution. All volatiles were removed under vacuum, affording white solids. The residues solids were washed with Et2O (3 × 2 mL), and then extracted with PhF (3 × 10 mL). The PhF solution was concentrated until 5 mL remained. Slow vapor diffusion of pentane into the concentrated PhF solution at -30°C for 1 day to afford colorless needle crystals, which were suitable for X-ray crystallography. Yield 8.4 mg (41%).

**1H NMR** (500 MHz, CD3CN, 298 K) *δ* = 7.68 (d, 2H, *J* = 1.9 Hz, NHC-*H*), 7.37–7.43 (m, 2H, B(C6*H*5)2), 7.23–7.29 (m, 6H, B(C6*H*5)2), 7.09 (d, 2H, *J* = 1.9 Hz, NHC-*H*), 6.49–6.53 (m, 2H, B(C6*H*5)2), 1.50 (s, 18H, C(C*H*3)3) ppm. **11B{1H} NMR** (160 MHz, CD3CN, 298 K) *δ* = 2.28 (brs), -1.08 – -0.62 (m) ppm. **19F{1H} NMR (**471 MHz, CD3CN, 298 K**)** *δ* = -128.58 – -128.44 (m, 2 F), -132.25 – -132.01 (m, 2 F), -136.13 – -135.96 (m, 4 F), -162.59 (t, *J* = 19.5 Hz, 2 F), -167.73 – -167.55 (m, 4 F), -191.58 (brs, 1 F) ppm. **13C{1H} NMR** (126 MHz, CD3CN, 298 K) *δ* = 30.76 (s, C(*C*H3)3), 62.27 (s, *C*(CH3)3), 115.95, 116.12, 123.97 (s, NHC-*C*H), 125.27 (s, *C*6F5), 128.49 (s, *C*6H5), 128.70 (s, *C*6F5), 128.77 (s, *C*6F5), 129.01 (s, NHC-*C*H), 130.02 (s, *C*6H5), 131.20 (s, *C*6H5), 131.27 (s, *C*6H5), 133.16 (s, *C*6H5), 135.13 (s, *C*6H5), 145.62 (s, *Ccarbene*-Sb), 162.78 (brs, *C*6F5), 164.71 (brs, *C*6F5) ppm.

Synthesis of [(Ph,*t*BuBCB)Sb-(CH2)4-O-B(C6F5)3] (**6**):

In a nitrogen filled glove box, a 20 mL scintillation vial was charged with a solution of [(Ph,*t*BuBCB)Sb] (5.3 mg, 10 μmol, 1.0 equiv.) in 2 mL of THF and a magnetic stir bar, a chilled solution of BCF (6.6 mg, 12.7 μmol, 1.27 equiv.) was added to this solution at -30 °C. Then the reaction mixture was slowly warmed to 25°C, the mixture was allowed to stir for 1 h to give a clear light-brown solution. All volatiles were removed under vacuum, affording brown solids. The residual solids were washed with hexane (3 × 1 mL), and then extracted with Et2O (3 × 2 mL). The Et2O solution was concentrated until 2 mL remained. The concentrated Et2O solution was placed at -30 °C for 1 day to afford colorless needle crystals, which were suitable for X-ray crystallography. Yield 7.3 mg (65%).

**1H NMR** (500 MHz, THF-*d*8, 298 K) *δ* = 7.79 (d, 2H, *J* = 1.9 Hz, NHC-*H*), 7.21–7.29 (m, 3H, B(C6*H*5)2), 7.05–7.15 (m, 5H, B(C6*H*5)2), 7.02 (d, 2H, *J* = 1.9 Hz, NHC-*H*), 6.52–6.58 (m, 2H, B(C6*H*5)2), 1.81 (s, 18H, C(C*H*3)3), 1.71–1.74 (m, 2H, C*H*2), 1.43–1.53 (m, 2H, C*H*2), 1.31–1.37 (m, 2H, C*H*2), 0.96–1.03 (m, 2H, C*H*2) ppm. **11B{1H} NMR** (160 MHz, THF-*d*8, 298 K) *δ* = 3.27 (brs), -2.91 ppm. **19F{1H} NMR (**471 MHz, THF-*d*8, 298 K**)** *δ* = -168.33 (t, 6F, *J* = 25.90 Hz), -165.41 (t, 3F, *J* = 20.2 Hz), -133.36 (d, 6F, *J* = 23.8 Hz) ppm. **13C{1H} NMR** (126 MHz, THF-*d*8, 298 K) *δ* = 23.79 (s, *C*H2), 25.57 (s, *C*H2), 25.97 (s, *C*H2), 32.12 (s, C(*C*H3)3), 36.62 (s, *C*H2), 61.64 (s, *C*(CH3)3), 122.70 (s, NHC-*C*H), 127.80 (s, *C*6H5), 128.55 (s, *C*6H5), 128.71 (s, NHC-*C*H), 129.12 (s, *C*6H5), 129.92 (s, *C*6H5), 131.56 (s, *C*6H5), 136.12 (s, *C*6H5), 136.33 (brs, *C*6F5), 138.25 (brs, *C*6F5), 140.06 (brs, *C*6F5), 143.43 (s, *Ccarbene*-Sb), 148.24 (brs, *C*6F5), 150.14 (brs, *C*6F5) ppm.

General procedures for iodoperfluoroalkylation of alkenes:

In a nitrogen filled glove box, a 5 mL scintillation vial equipped with a stirring bar, the olefin (0.2 mmol, 1.0 equiv.), perfluoroalkyl iodide (0.4 mmol, 2.0 equiv.), catalyst (10.0 μmol, 10% mol equiv.) were added. Solvent was added (1.0 mL) and the reaction was stirred at 25°C for 12 h, with 365 nm light. After this time, the volatile in this mixture was removed under vacuum. The reaction mixture extracted with CH2Cl2 and purified by silica gel chromatography to afford the products (PE:EA = 20:1) as a transparent oil liquid. **1H NMR** (400 MHz, CDCl3, 298 K) *δ* = 7.31 (t, 2H, *J* = 7.8 Hz, Ph-*H*), 7.02 (t, 1H, *J* = 7.3 Hz, Ph-*H*), 6.92 (d, 2H, *J* = 7.8 Hz, Ph-*H*), 4.57–4.48 (m, 1H), 4.30 (dd, 1H, *J* = 10.5, 4.9 Hz, 2H), 4.19 (dd, 1H, *J* = 10.4, 6.7 Hz), 3.29–3.09 (m, 1H), 2.91–2.71 (m, 1H) ppm. **19F{1H} NMR (**376 MHz, CDCl3, 298 K**)** *δ* = -80.76 (t, 3F, *J* = 10.0 Hz), -113.46 (td, 1F, *J* = 14.8,14.1, 4.4 Hz), -113.62 (td, 1F, *J* = 14.0, 13.3, 4.1 Hz), -121.6 – -121.90 (m, 2F), -122.69 – -122.96 (m, 2F), -123.44 – -123.70 (m, 2F), -125.99 – -126.24 (m, 2F) ppm.

Proposed mechanism of iodoperfluoroalkylation

**Spectroscopic Data**

**Figure S01**. 1H NMR spectrum of [(Ph,*t*BuBCB)(SbCl2)] (**1**) in C6D6 (298 K)

**Figure S02**. 1H NMR spectrum of [(Ph,*t*BuBCB)(SbCl2)] (**1**) in THF-*d*8 (298 K)

**Figure S03**. 11B{1H} NMR spectrum of [(Ph,*t*BuBCB)(SbCl2)] (**1**) in THF-*d*8 (298 K)

**Figure S04**. 13C{1H} NMR spectrum of [(Ph,*t*BuBCB)(SbCl2)] (**1**) in THF-*d*8 (298 K)

**Figure S05.** 1H NMR spectrum of[(Ph,*t*BuBCB)Sb](**2**) in C6D6 (298 K)

**Figure S06.** 11B{1H} NMR spectrum of[(Ph,*t*BuBCB)Sb](**2**) in C6D6 (298 K)

**Figure S07**. 1H NMR spectrum of [(Ph,*t*BuBCB)Sb] (**2**) in THF-*d*8 (298 K)

**Figure S08**. 11B{1H} NMR spectrum of [(Ph,*t*BuBCB)Sb] (**2**) in THF-*d*8 (298 K)

**Figure S09**. 13C{1H} NMR spectrum of [(Ph,*t*BuBCB)Sb] (**2**) in THF-*d*8 (298 K)

**Figure S10**. Full 1H-13C multiplicity-edited HSQC of [(Ph,*t*BuBCB)Sb] (**2**) in THF-*d*8 (298 K)

**Figure S11**. 1H NMR spectrum of (Ph,*t*BuBCB)Sb[Rh(CO)(acac)] (**3**) in THF-*d*8 (298 K)

**Figure S12**. 11B{1H} NMR spectrum of (Ph,*t*BuBCB)Sb[Rh(CO)(acac)] (**3**) in THF-*d*8 (298 K)

**Figure S13**. 13C{1H} NMR spectrum of (Ph,*t*BuBCB)Sb[Rh(CO)(acac)] (**3**) in THF-*d*8 (298 K)

**Figure S14**. Full 1H-13C multiplicity-edited HSQC of (Ph,*t*BuBCB)Sb[Rh(CO)(acac)] (**3**) in THF-*d*8 (298 K)

**Figure S15**. 1H NMR spectrum of (Ph,*t*BuBCB)Sb[PdCl(*η*3-allyl)]2 (**4**) in CD2Cl2 (298 K)

**Figure S16**. 13C{1H} NMR spectrum of (Ph,*t*BuBCB)Sb[PdCl(*η*3-allyl)]2 (**4**) in CD2Cl2 (298 K)

**Figure S17**. 11B{1H} NMR spectrum of (Ph,*t*BuBCB)Sb[PdCl(*η*3-allyl)]2 (**4**) in CD2Cl2 (298 K)

**Figure S18**. Full 1H-13C multiplicity-edited HSQC of (Ph,*t*BuBCB)Sb[PdCl(*η*3-allyl)]2 (**4**) in CD2Cl2 (298 K)

**Figure S19**. 1H NMR spectrum of [(Ph,*t*BuBCB)Sb(C6F4)BF(C6F5)2] (**5**) in CD3CN (298 K)

**Figure S20**. 13C{1H} NMR spectrum of [(Ph,*t*BuBCB)Sb(C6F4)BF(C6F5)2] (**5**) in CD3CN (298 K)

**Figure S21**. 11B{1H} NMR spectrum of [(Ph,*t*BuBCB)Sb(C6F4)BF(C6F5)2] (**5**) in CD3CN (298 K)

**Figure S22**. 19F{1H} NMR spectrum of [(Ph,*t*BuBCB)Sb(C6F4)BF(C6F5)2] (**5**) in CD3CN (298 K)

**Figure S23**. Full 1H-13C multiplicity-edited HSQC of [(Ph,*t*BuBCB)Sb(C6F4)BF(C6F5)2] (**5**) in CD3CN (298 K)

**Figure S24**. 1H NMR spectrum of [(Ph,*t*BuBCB)Sb-(CH2)4-O-B(C6F5)3] (**6**) in THF-*d*8 (298 K)

**Figure S25**. 13C{1H} NMR spectrum of [(Ph,*t*BuBCB)Sb-(CH2)4-O-B(C6F5)3] (**6**) in THF-*d*8 (298 K)

**Figure S26**. 11B{1H} NMR spectrum of [(Ph,*t*BuBCB)Sb-(CH2)4-O-B(C6F5)3] (**6**) in THF-*d*8 (298 K)

**Figure S27**. 19F{1H} NMR spectrum of [(Ph,*t*BuBCB)Sb-(CH2)4-O-B(C6F5)3] (**6**) in THF-*d*8 (298 K)

**Figure S28**. Full 1H-13C multiplicity-edited HSQC of [(Ph,*t*BuBCB)Sb-(CH2)4-O-B(C6F5)3] (**6**) in THF-*d*8 (298 K)

**Figure S29**. 1H NMR spectrum of (5-n-perfluorohexyl-3-iododecyl)benzene in CDCl3 (298 K)

**Figure S30**. 19F{1H} spectrum of (5-n-perfluorohexyl-3-iododecyl)benzene in CDCl3 (298 K)

**Summary of Crystal Data**

**X-ray crystallographic details**: Data collection was performed on a Rigaku XtaLAB Supernova diffractometer with an HyPix area detector with confocal multilayer optic-monochromated Cu-Kα radiation (λ = 1.54184 Å) at 173 K, or a Rigaku Supernova diffractometer with Atlas S2 area detector with confocal multilayer optic-monochromated Cu-Kα radiation (λ = 1.54184 Å) at 173 K. The structures were solved by direct methods by using SHELXT and refined by full-matrix least squares based on F2 using SHELXL-2018. CCDC entries [(Ph,*t*BuBCB)SbCl2] (**1**) 2473535, [(Ph,*t*BuBCB)Sb] (**2**) 2473537, (Ph,*t*BuBCB)Sb[PdCl(*η*3-allyl)]2 (**4**) 2473940, [(Ph,*t*BuBCB)Sb(C6F4)BF(C6F5)2] (**5**) 2473937, [(Ph,*t*BuBCB)Sb-(CH2)4-O-B(C6F5)3] (**6**) 2473936 contain the supplementary crystallographic data for this paper. These data can be obtained free of charge from the Cambridge Crystallographic Data Centre via. Crystal parameters and refinement results are given in **Table S1**.

**Table S1.** Summary of crystallographic data for compounds reported in this work.

| Identification code | [(Ph,*t*BuBCB)SbCl2] | [(Ph,*t*BuBCB)Sb] | [(Ph,*t*BuBCB)SbRh(acac)(CO)] |
| --- | --- | --- | --- |
| Empirical formula | C33H40BCl2N4Sb | C52H64B2N8Sb2 | C32H38BN4O3RhSb |
| Formula weight | 696.15 | 1066.23 | 762.13 |
| Temperature/K | 173.00(10) | 173.00(10) | 173.00(10) |
| Crystal system | monoclinic | monoclinic | monoclinic |
| Space group | P21/n | P21/c | P21/n |
| a/Å | 11.2125(3) | 11.1261(3) | 15.4494(8) |
| b/Å | 13.5169(2) | 11.3079(2) | 8.3395(5) |
| c/Å | 21.8376(4) | 39.7146(9) | 30.0518(11) |
| α/° | 90 | 90 | 90 |
| β/° | 96.970(2) | 97.649(2) | 92.596(5) |
| γ/° | 90 | 90 | 90 |
| Volume/Å3 | 3285.21(12) | 4952.1(2) | 3867.9(3) |
| Z | 4 | 4 | 4 |
| ρcalcg/cm3 | 1.407 | 1.430 | 1.309 |
| μ/mm‑1 | 8.366 | 8.981 | 9.240 |
| F(000) | 1424.0 | 2176.0 | 1532.0 |
| Crystal size/mm3 | 0.2 × 0.1 × 0.1 | 0.5 × 0.5 × 0.01 | 0.1 × 0.01 × 0.01 |
| Radiation | Cu Kα (λ = 1.54184) | Cu Kα (λ = 1.54184) | Cu Kα (λ = 1.54184) |
| 2Θ range for data collection/° | 7.708 to 152.044 | 7.818 to 152.02 | 6.32 to 153.766 |
| Index ranges | -14 ≤ h ≤ 13, -17 ≤ k ≤ 14, -20 ≤ l ≤ 27 | -9 ≤ h ≤ 13, -14 ≤ k ≤ 14, -47 ≤ l ≤ 49 | -19 ≤ h ≤ 15, -7 ≤ k ≤ 9, -37 ≤ l ≤ 25 |
| Reflections collected | 23360 | 39824 | 13327 |
| Independent reflections | 6746 [Rint = 0.0636, Rsigma = 0.0623] | 10451 [Rint = 0.0604, Rsigma = 0.0553] | 6046 [Rint = 0.0648, Rsigma = 0.0764] |
| Data/restraints/parameters | 6746/0/377 | 10451/0/590 | 6046/287/387 |
| Goodness-of-fit on F2 | 1.009 | 1.083 | 1.095 |
| Final R indexes [I>=2σ (I)] | R1 = 0.0408, wR2 = 0.0881 | R1 = 0.0645, wR2 = 0.1727 | R1 = 0.1772, wR2 = 0.4894 |
| Final R indexes [all data] | R1 = 0.0575, wR2 = 0.0950 | R1 = 0.0803, wR2 = 0.1916 | R1 = 0.1964, wR2 = 0.4990 |
| Largest diff. peak/hole / e Å-3 | 0.71/-0.60 | 2.58/-2.24 | 5.50/-1.90 |

| Identification code | [(Ph,*t*BuBCB)Sb-(Pd(*η*3-C3H5)Cl)2] | [(Ph,*t*BuBCB)Sb-(CH2)4-O-B(C6F5)3] | [(Ph,*t*BuBCB)Sb-(C6F4)-B(F)(C6F5)2] |
| --- | --- | --- | --- |
| Empirical formula | C32H42BCl2N4Pd2Sb | C52H50B2F15N4O2Sb | C48H42B2F15N4OSb |
| Formula weight | 898.95 | 1191.33 | 1119.22 |
| Temperature/K | 173.00(10) | 293(2) | 173.00(10) |
| Crystal system | tetragonal | triclinic | triclinic |
| Space group | P43212 | P-1 | P-1 |
| a/Å | 13.35437(5) | 10.1787(4) | 12.2361(3) |
| b/Å | 13.35437(5) | 16.4092(7) | 13.8674(4) |
| c/Å | 43.1985(3) | 16.6567(7) | 16.8994(5) |
| α/° | 90 | 76.492(4) | 99.843(2) |
| β/° | 90 | 85.744(3) | 107.396(3) |
| γ/° | 90 | 73.440(4) | 105.785(2) |
| Volume/Å3 | 7703.99(7) | 2592.8(2) | 2531.87(13) |
| Z | 8 | 2 | 2 |
| ρcalcg/cm3 | 1.550 | 1.526 | 1.468 |
| μ/mm‑1 | 14.436 | 5.096 | 5.165 |
| F(000) | 3552.0 | 1204.0 | 1124.0 |
| Crystal size/mm3 | 0.1 × 0.1 × 0.1 | 0.1 × 0.01 × 0.01 | 0.5 × 0.1 × 0.1 |
| Radiation | Cu Kα (λ = 1.54184) | Cu Kα (λ = 1.54184) | Cu Kα (λ = 1.54184) |
| 2Θ range for data collection/° | 6.928 to 153.862 | 7.002 to 130.176 | 5.7 to 155.194 |
| Index ranges | -16 ≤ h ≤ 14, -16 ≤ k ≤ 16, -54 ≤ l ≤ 53 | -8 ≤ h ≤ 11, -17 ≤ k ≤ 19, -19 ≤ l ≤ 19 | -13 ≤ h ≤ 15, -17 ≤ k ≤ 16, -21 ≤ l ≤ 21 |
| Reflections collected | 112698 | 16209 | 33641 |
| Independent reflections | 8038 [Rint = 0.0455, Rsigma = 0.0158] | 8812 [Rint = 0.1579, Rsigma = 0.1551] | 10216 [Rint = 0.0772, Rsigma = 0.0697] |
| Data/restraints/parameters | 8038/21/405 | 8812/6/693 | 10216/0/649 |
| Goodness-of-fit on F2 | 1.062 | 1.020 | 1.061 |
| Final R indexes [I>=2σ (I)] | R1 = 0.0248, wR2 = 0.0561 | R1 = 0.0659, wR2 = 0.1418 | R1 = 0.0554, wR2 = 0.1481 |
| Final R indexes [all data] | R1 = 0.0254, wR2 = 0.0563 | R1 = 0.1036, wR2 = 0.1527 | R1 = 0.0654, wR2 = 0.1550 |
| Largest diff. peak/hole / e Å-3 | 0.37/-0.51 | 2.06/-1.29 | 1.27/-0.97 |


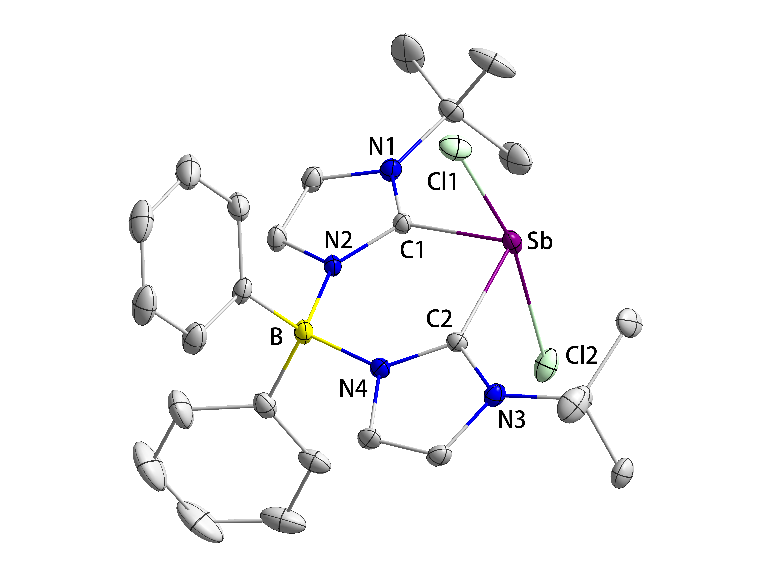


**Figure S31.** Crystallographic structure of [(Ph,*t*BuBCB)SbCl2] (**1**), with thermal ellipsoids at 30% probability level. The hydrogen atoms were omitted for clarity.


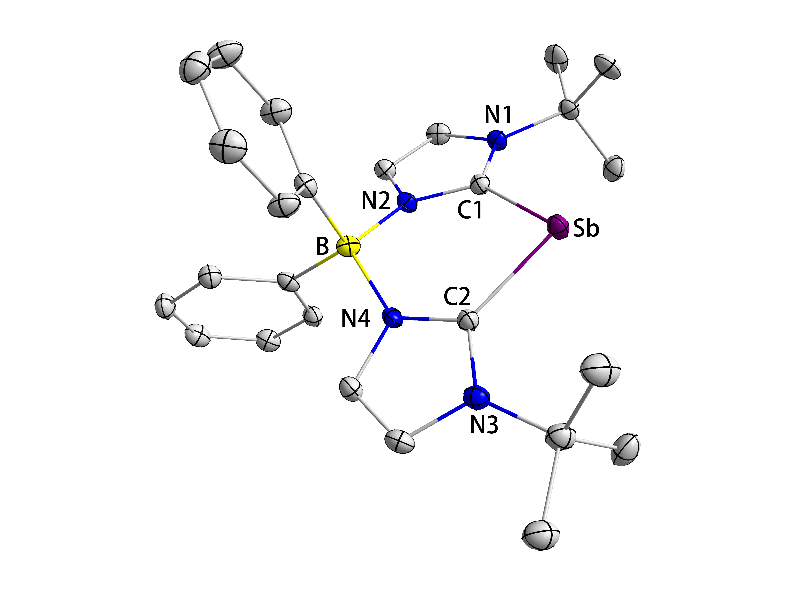


**Figure S32.** Crystallographic structure of [(Ph,*t*BuBCB)Sb] (**2**), with thermal ellipsoids at 30% probability level. The hydrogen atoms were omitted for clarity.


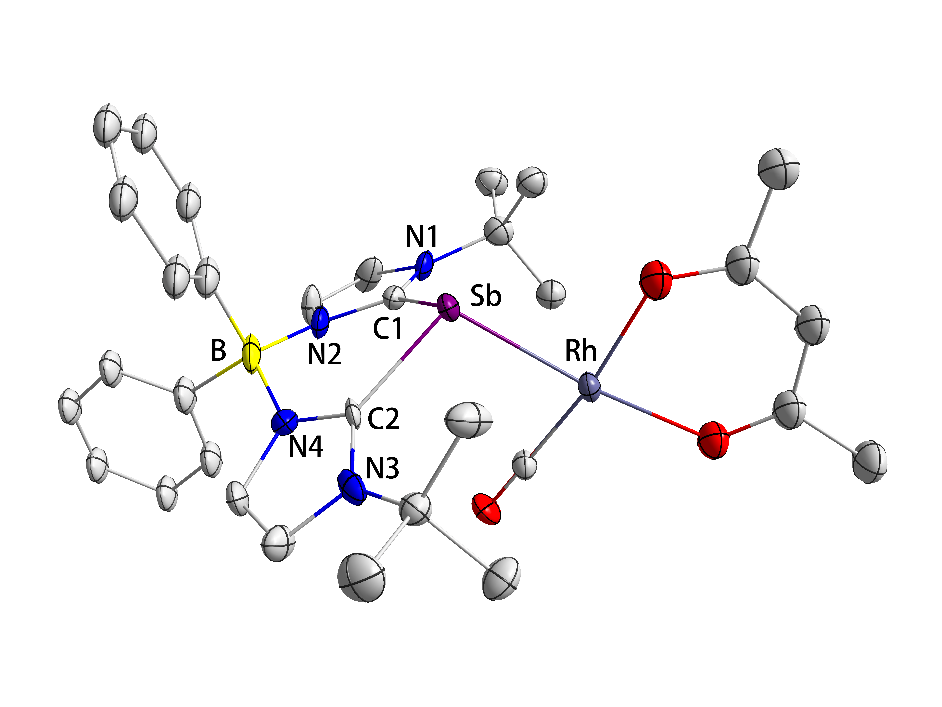


**Figure S33.** Showing the connectivity of (Ph,*t*BuBCB)Sb[Rh(CO)(acac)] (**3**), with thermal ellipsoids at 30% probability level. The hydrogen atoms were omitted for clarity.


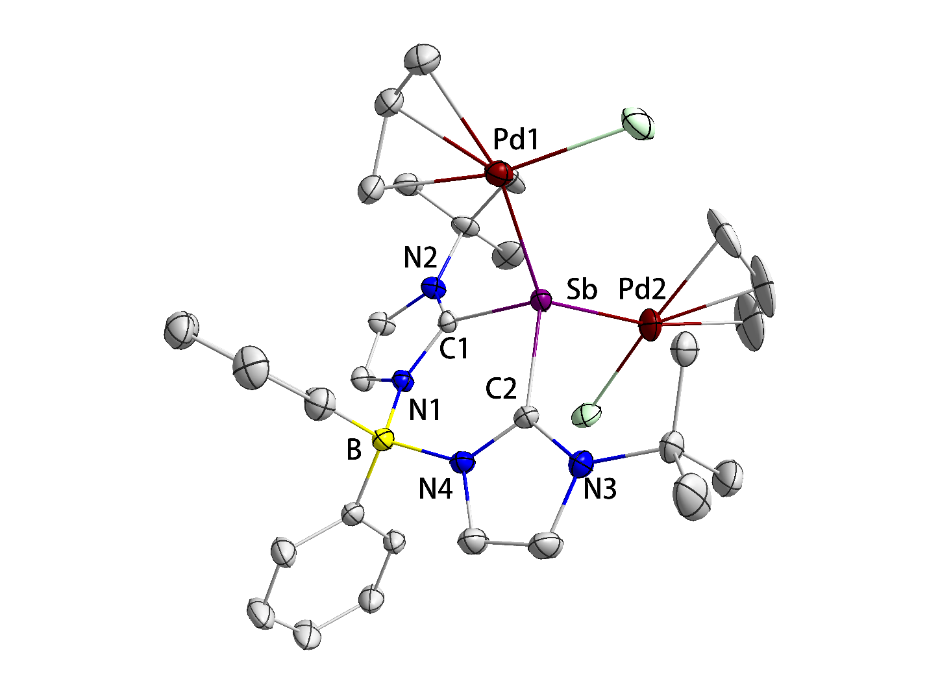


**Figure S34.** Crystallographic structure of (Ph,*t*BuBCB)Sb[PdCl(*η*3-allyl)]2 (**4**), with thermal ellipsoids at 30% probability level. The hydrogen atoms were omitted for clarity.


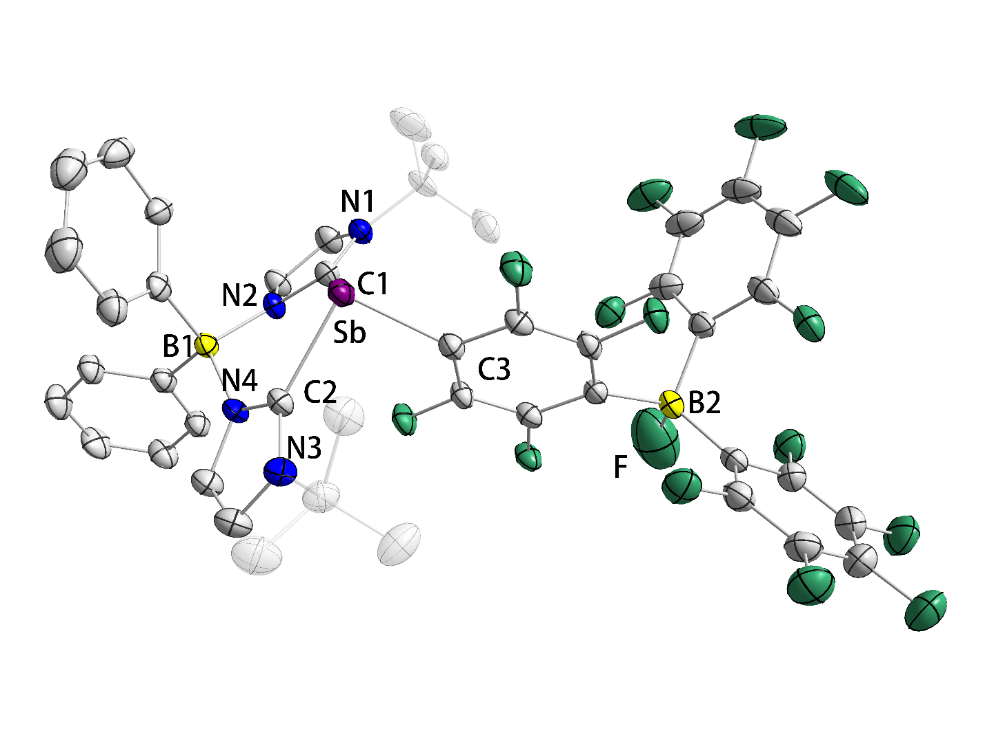


**Figure S35.** Crystallographic structure of [(Ph,*t*BuBCB)Sb(C6F4)BF(C6F5)2] (**5**), with thermal ellipsoids at 30% probability level. The hydrogen atoms were omitted for clarity.


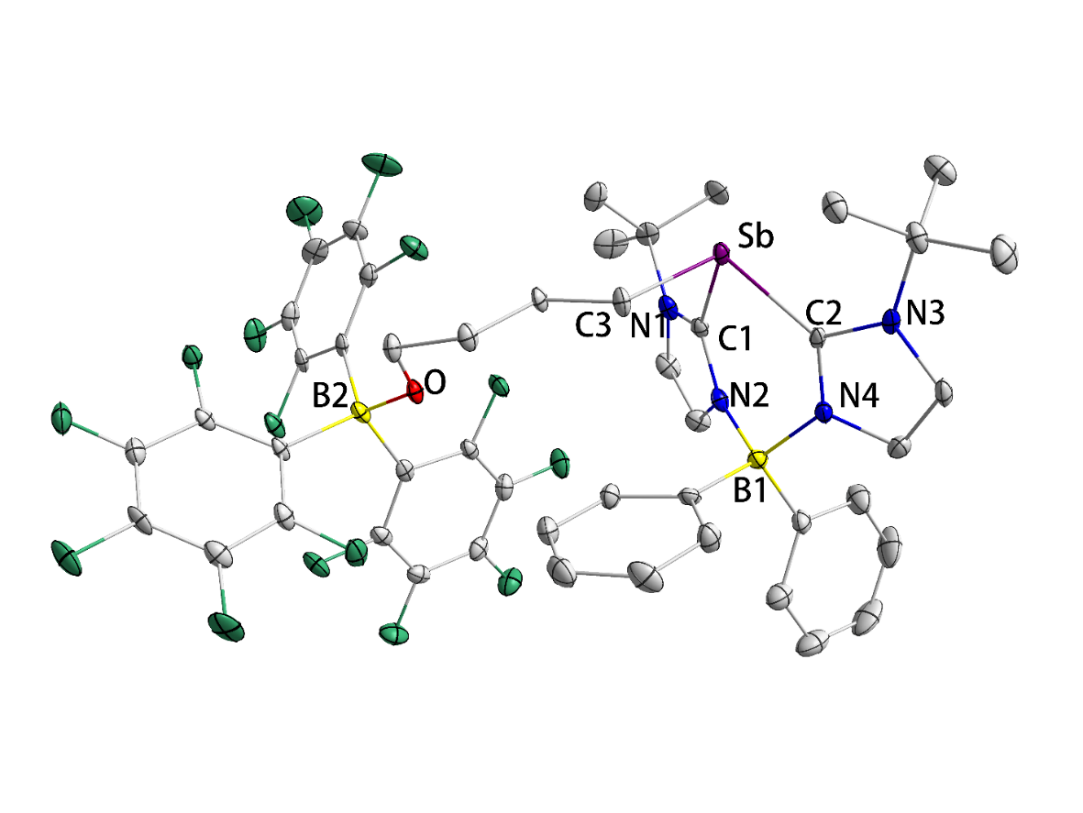


**Figure S36.** Crystallographic structure of the cationic portion of [(Ph,*t*BuBCB)Sb-(CH2)4-O-B(C6F5)3] (**6**), with thermal ellipsoids at 30% probability level. The hydrogen atoms were omitted for clarity.

**Details of Computational Results**

**Computational methods and details**: All DFT calculations were performed using the ORCA software package (Version 5.0.3).[9] All geometries were optimized and analyzed on the b3lyp D3 ZORA/ZORA-def2-TZVP level of theory.[10] Autoaux was used to generate auxiliary basis sets.[11] Geometry optimizations used input coordinates adapted from the corresponding crystallographically determined molecular structure. Coulomb and exchange integrals for the calculations were accelerated through the use of the RIJCOSX approximation. Tight convergence of the electronic iterations was set using the TIGHTSCF keyword. Solvation effects were approximated using the CPCM solvation model in toluene. Topology analysis, orbital composition analysis and electron localization function (ELF) were performed using the MultiWfn 3.8 (dev 2025-05-05) package.[12] Frontier molecular orbital plots were generated with IBOView.[13]


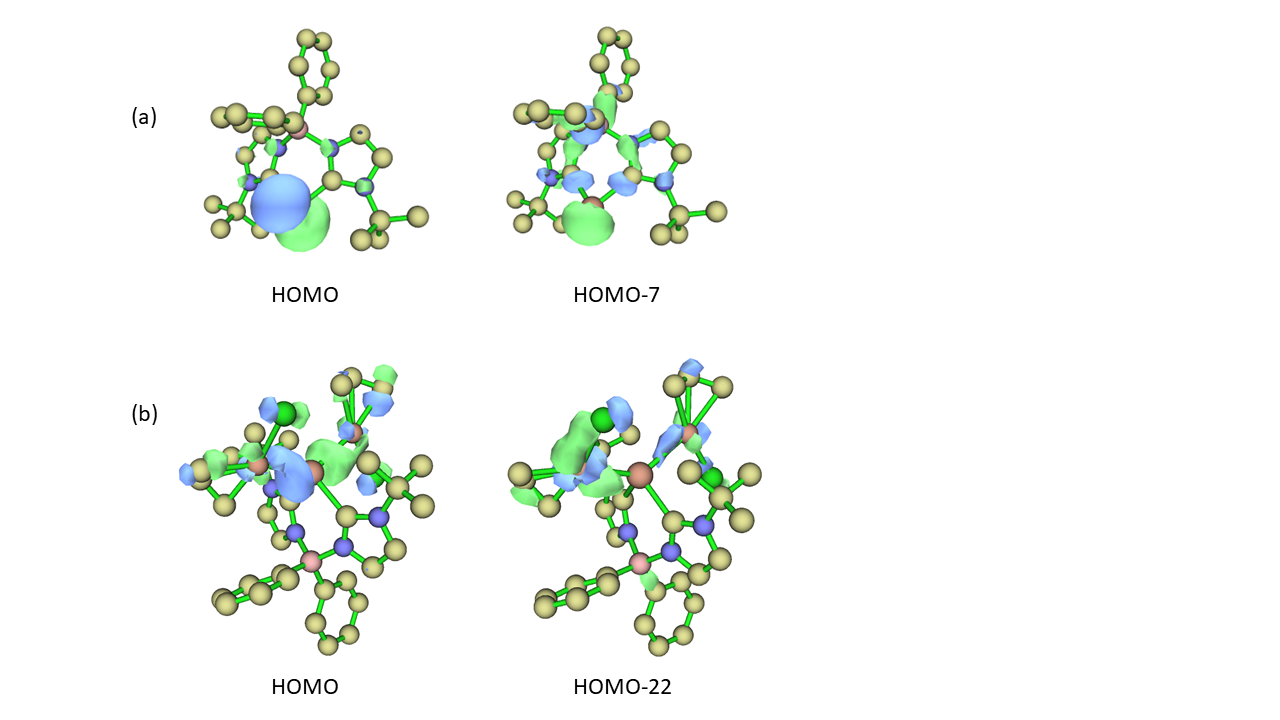


**Figure S37.** Frontier molecular orbital of (Ph,*t*BuBCB)Sb[PdCl(η3-allyl)]2 (**4**).

**DFT Energies and Optimized Coordinates**

[(Ph,*t*BuBCB)Sb] (**2**)**, S = 0**

G = -7827.096900020164 Eh

Sb 0.43775742692649 0.15906113921528 0.18905872562011

N 0.52590080185643 -2.83804763944077 1.35899091595842

N -0.93323924219354 1.00972510220642 2.85802477492170

N 0.04108656349861 -1.35328152155939 2.88849297238470

C 0.80948982407280 -3.50499978923754 0.04959245277981

N -1.61519958172478 2.37806689141159 1.29485406110753

C 0.33859886925428 -1.50392501419633 1.58045354102169

C -0.81521111033163 1.30003912693135 1.54496926718802

C 0.03520573802393 -2.59487483660659 3.49284163638832

H -0.16711092811023 -2.71791040428254 4.53973478150997

C -2.23766569609586 2.75290170986154 2.47667999531675

H -2.91281215322411 3.58244553793379 2.54262160554050

C -0.06119609730587 0.01508017341426 6.32244035456473

H 0.94134005767113 0.42387994073883 6.30304991472310

C -0.71127664926220 -0.25482985064968 5.11627721987936

C 0.33537956967105 -3.51805955419864 2.55285764480561

H 0.43501869315424 -4.58142016782243 2.64123623395902

C -1.86537496653027 3.02915108217152 -0.02936534096980

C -1.81273946056551 1.90286072037245 3.43720534490887

H -2.05138144523154 1.86971169370932 4.48317175595544

C 1.47109535246531 0.62886811706171 3.78405254504696

C -1.95257836935054 -0.75473365716615 7.60618527025879

H -2.42746324144081 -0.94717346556395 8.56075378416780

C 1.69154513117624 2.00899317767663 3.84167806630524

H 0.85040988643392 2.68754309812886 3.75483903191039

C -2.66874367391357 4.31485239154275 0.17915099281700

H -2.80349464782068 4.78961852717135 -0.79212072040380

H -2.14422236697275 5.01566177551031 0.83021369706383

H -3.65806076352413 4.11540448355812 0.59092860146451

C -2.67158268549426 2.06848689101317 -0.90728902552972

H -3.63245952111548 1.84841690506250 -0.43900243136909

H -2.13669518645659 1.13195750168649 -1.06341508066227

H -2.85522294279085 2.52902838640689 -1.87901710851724

C 4.06912433517442 1.70144109014833 4.09699022715863

H 5.06498403085613 2.11231813230369 4.21132774470115

C 2.02101695364931 -2.84200968624123 -0.61039271513320

H 1.81388786116981 -1.82647159239471 -0.94558187591467

H 2.30479339164086 -3.41745121281084 -1.49204481137580

H 2.86694665791465 -2.81531069595408 0.07722444063766

C -2.00789067275292 -0.78415587191421 5.19873052636139

H -2.54787627425308 -1.00791369637408 4.28452933605123

C -0.66795954902082 -0.22843114636789 7.55378550718395

H -0.13536628388241 -0.00667132165513 8.47133895237977

C 2.96694711009761 2.54414470028966 3.99384671524082

H 3.10232707410521 3.61917325847301 4.02729251898814

C -0.52847464839971 3.40216539167561 -0.67433322219949

H -0.71813211617959 3.97475879913730 -1.58268132815842

H 0.05704816409595 2.52993618757166 -0.96139860657320

H 0.06818758463476 4.01149119719500 0.00525394260013

C -0.43836841798872 -3.41012568180251 -0.83230223754078

H -1.27466915947768 -3.92761206910670 -0.35935799257840

H -0.23927015608832 -3.87925357197160 -1.79691227468916

H -0.72081572047739 -2.37165173661020 -1.00323308503685

C -2.62496147748465 -1.03268752234930 6.41810765044283

H -3.62804542627300 -1.44230299152212 6.44581864525798

B -0.02229827604054 0.01299502490713 3.67460553500850

C 2.59539655653475 -0.19594216951829 3.89507922018319

H 2.47293894516067 -1.27251370409994 3.85180346913461

C 3.87681213856800 0.32438189546361 4.04780519657309

H 4.72682273444880 -0.34408030820102 4.12363798294651

C 1.14591267278479 -4.97792169433678 0.29126513898007

H 2.01078903815945 -5.09007512479558 0.94670550066750

H 1.38736472826994 -5.43054942701415 -0.66987295733834

H 0.30350701630446 -5.52561992418575 0.71342637592485

(Ph,*t*BuBCB)Sb[PdCl(η3-allyl)]2 (**4**), **S = 0**

G = -19194.616339689386 Eh

Sb 1.56798024486880 0.34746179280473 1.44811070363638

Pd 1.79482453281795 2.85953538996605 2.14635759238178

Pd 1.56948916966041 -1.94950404156544 2.67743059816243

Cl 0.46922639310936 2.76904304209785 4.16018094241082

Cl 1.55724138321368 -3.26580132962654 0.65135033371874

N 2.89763535926392 -0.09296148484303 -1.33910461174289

N 0.31280876476603 -0.17974041988156 -1.35168907991468

N 4.45904926874296 -0.28156111864800 0.17830549918491

N -1.27865726031930 -0.36565306083554 0.13288278377854

C 3.13793918561142 -0.02517114070512 -0.01934423379670

C 1.53803745035363 1.91561132475044 -2.30270956315708

C 4.07556331274434 -0.40334257253379 -1.98700939616036

H 4.12822770340080 -0.50901802543434 -3.05350468415374

C 5.04321763304974 -0.52621423277977 -1.05220620272254

H 6.08181842637864 -0.76571738106769 -1.16492060931431

C 1.61714834169813 -0.49600001897387 -3.55131089911703

C 0.41207659008554 2.67723739781024 -1.97637831796366

H -0.46348778466880 2.19496224140912 -1.55983423135295

C 0.02847353925479 -0.03944815567722 -0.04603801173381

C -0.82374163682581 -0.60386664875028 -2.00764860892482

H -0.84068070840810 -0.77174583853718 -3.06714143833720

C 2.63535177936846 2.60677290696136 -2.83390090950101

H 3.53238622942255 2.06012695503309 -3.10142374955361

C 5.23124196075617 -0.43917295296554 1.45964932525796

C 1.60856823250318 -1.97916134406321 -5.95445573018375

H 1.60546396592706 -2.54770933833798 -6.87649599227544

C 1.71942818352617 -1.89544451360976 -3.54967881509087

H 1.79931509660049 -2.42069550985205 -2.60384154557113

C 0.37794554210623 4.05748036583267 -2.16421185120799

H -0.50952161941864 4.61625030260543 -1.89171622159131

C 2.61377654961368 3.98163784082214 -3.03174134768503

H 3.48207084466510 4.48264764095697 -3.44315066012212

C 1.50643838433895 0.13207841009860 -4.79266245694215

H 1.41957098725112 1.21034794830367 -4.83764045037284

C -1.80937543382054 -0.72691394373980 -1.09094247640426

H -2.82951608217779 -1.03267677097921 -1.21263086477796

B 1.58935448736796 0.30674272447300 -2.14454788743539

C 1.71656974182879 -2.63090547982148 -4.72748915098718

H 1.79666816922765 -3.71099823390903 -4.69212426681648

C -2.08711554024030 -0.42065604842305 1.39829350437551

C 1.50212473409704 -0.59443040616527 -5.98305252935218

H 1.41370709878808 -0.07675289211917 -6.93095361511328

C 3.00737868521879 3.45616055670470 0.48751623638341

C 1.48010741937803 4.71674320691108 -2.69498247801662

H 1.45960950836347 5.78968646153967 -2.84092075359108

C -2.00542085801789 -1.84059482258035 1.96064917029985

H -2.38670874772396 -2.56523884793760 1.24033325117085

H -2.60185983663009 -1.90413702915633 2.87153767730244

H -0.97440621747009 -2.10282621021635 2.20284478018316

C 5.17997042772823 -1.91402206039668 1.86275461549948

H 5.61804785286381 -2.54104028320231 1.08528630061433

H 4.15059753818689 -2.23432641075140 2.02795981869778

H 5.74259619544922 -2.05848027388972 2.78597694347478

C -3.53905304396432 -0.06127706493255 1.06442880252875

H -3.59677207056279 0.90831610957183 0.56785050598436

H -4.09746365381269 -0.00443000773362 1.99805069092738

H -4.02193266959677 -0.81141153392970 0.44013728295774

C 6.67968937474935 -0.00212755124275 1.21143495291277

H 7.20894040444523 -0.02913792673889 2.16301835746698

H 6.72001340774821 1.01594059160778 0.82160390650626

H 7.20503149025808 -0.66690674252817 0.52805991897435

C -1.56252331636737 0.59856964182560 2.40066858839614

H -0.62290195523186 0.29388122461195 2.85435406016405

H -2.27412637104222 0.68357049268478 3.22090294003946

H -1.44281629902573 1.58286746506131 1.95189426794541

C 4.65889508864701 0.44618923982951 2.56208393533411

H 3.71127095468639 0.07195412819450 2.94471884957165

H 4.54210399426959 1.47700778873976 2.23232359020186

H 5.35058182856282 0.43504065794624 3.40382600306660

C 2.33360768727971 5.02739699151356 2.19739057271582

C 1.42221074037089 -1.13739462021899 4.65081155825308

C 1.44730086607023 -3.53949176604131 4.28159554791549

H 2.25906526645495 3.77612110805061 -0.22561834168853

H 3.74680127124006 2.76782573286227 0.10259644131675

H 1.48458429880272 5.38333296641875 1.62432498917656

H 2.51133768730443 5.50439644937642 3.15145175085080

C 3.33941164244182 4.28309261467615 1.58419536868998

H 4.28533815708666 4.14220535878444 2.09596986091314

H 0.34775937843837 -1.07846027672412 4.79009831920753

H 1.96716690185761 -0.23400622062319 4.88952202319968

H 0.36681308104196 -3.62356795451686 4.29797235062604

H 2.00584585091167 -4.45842728014272 4.16821055427172

C 2.07898155583399 -2.38793248776179 4.74204984906358

H 3.14660326322583 -2.40986479572600 4.93273606696078

**References**

1. S. Weitz, M. Rabinovitz, The Application of C8K for Organic Synthesis: Reduction of Substituted Naphthalenes. *J. Chem. Soc., Perkin Trans.* **1993**, *1*, 117 ‒ 120.
2. T. V. Le, O. Daugulis, *In situ ortho*-lithiation/functionalization of pentafluorosulfanyl arenes. *Chem. Commun.*, **2022**, *58*, 537 - 540
3. **A. K. Hickey, W.-T. Lee, C.-H. Chen, M. Pink, and J. M. Smith, A Bidentate Carbene Ligand Stabilizes a Low-Coordinate Iron(0) Carbonyl Complex. Organometallics** **2016**, *35*, 3069 ‒ 3073.
4. G. M. Fischer, M. I.-Krondahl, I. G.-Schnetmann, E. Daltrozzo, A. Zumbusch, Pyrrolopyrrol Cyanine (PPCy) dyes: A new class of near-infrared dyes and fluorophores. *Chem. Eur. J.,* **2009**, *15*, 4857 – 4864
5. J. Liu, J. Chen, J. Zhao, Y. Zhao, L. Li, H. Zhang, A Modified Procedure for the Synthesis of 1-Arylimidazoles. *Synth.*, **2003**, *17*, 2661 ‒ 2666.
6. M. E. Garner, S. Hohloch, L. Maron, J. Arnold, A New Supporting Ligand in Actinide Chemistry Leads to Reactive Bis(NHC)borate-Supported Thorium Complexes. *Organometallics* **2016**, *35*, 2915 – 2922.
7. S. Creager, Solvents and Supporting Electrolytes, *Handbook of Electrochemistry*, Elsevier, **2007**, 57 ‒ 72.
8. L. Kaplan, W. L. Kester, J. J. Katz, Some Properties of Iron Biscyclopentadienyl. *J. Am. Chem. Soc.* **1952**, *74*, 5531 ‒ 5532.
9. a) F. Neese, The ORCA Program System. *WIREs Computational Molecular Science* **2012**, *2*, 73-78. DOI: https://doi.org/10.1002/wcms.81. b) F. Neese, Software Update: The ORCA Program System—Version 5.0. *WIREs computational Molecular Science* **2022**, 12, e1606, DOI: <https://doi.org/10.1002/wcms.1606>.
10. a) S. Grimme, Semiempirical GGA-Type Density Functional Constructed with A Long-Range Dispersion Correction. *J. Comput. Chem.* **2006**, *27*, 1787 – 1799; b) S. Grimme, J. Antony, S. Ehrlich, H. Krieg, A Consistent and Accurate Ab Initio Parametrization of Density Functional Dispersion Correction (DFT-D) for The 94 Elements H-Pu. *J. Chem. Phys*. **2010**, *132*, 154104 – 1–19; c) S. Grimme, S. Ehrlich, L. Goerigk, Effect of the Damping Function in Dispersion Corrected Density Functional Theory. *J. Comput. Chem.* **2011**, 32, 1456 – 1465. d) F. Weigend, R. Ahlrichs, Balanced Basis Sets of Split Valence, Triple Zeta Valence and Quadruple Zeta Valence Quality for H to Rn: Design and Assessment of Accuracy. *Phys. Chem. Chem. Phys.* **2005**, *7*, 3297 ‒ 3305.
11. G. L. Stoychev, A. A. Auer, F. Neese, Automatic Generation of Auxiliary Basis Sets. *J. Chem. Theory Comput.* **2017**, *13*, 554 ‒ 562.
12. Tian Lu, Feiwu Chen, Multiwfn: A Multifunctional Wavefunction Analyzer. *J. Comput. Chem.*, **2012**, *33*, 580 ‒ 592.
13. G. Knizia, Intrinsic Atomic Orbitals: An Unbiased Bridge between Quantum Theory and Chemical Concepts *J. Chem. Theory Comput.*, **2013**, *9*, 4834 ‒ 4843.
